# Supplementary material for: A-type lamins bind both hetero- and euchromatin, the latter being regulated by lamina-associated polypeptide 2 alpha
Source: Genome Res. 2016 Apr;26(4):462–73. doi: 10.1101/gr.196220.115 (PMC4817770; doi:10.1101/gr.196220.115)
Supplement: Supplemental Material [file supp_gr.196220.115_Supplemental_Table1.xlsx]

## Sheet: Sheet1
Supplementary Table 1: significantly (FDR<=0.05) deregulated genes LAP2α KO vs. WT
Gene ID	Gene symbol	Gene Length [bp]	edgeR.logFC	edgeR.logCPM	edgeR.p.value	edgeR.FDR
NM_011605	Tmpo	3813	-7.84204	5.33246	1.09756e-76	1.15145e-72
NM_008176	Cxcl1	949	-4.48722	5.60155	4.17145e-48	2.18813e-44
NM_011858	Tenm4	10633	4.11311	6.20957	2.20059e-46	7.69547e-43
NM_026239	Tmem35	1918	-5.31681	4.27733	8.23728e-39	2.16043e-35
NM_028279	Naalad2	2690	-4.85513	3.9425	7.74076e-33	1.62417e-29
NM_177346	Gpr149	3336	4.13963	4.81838	2.88513e-31	5.04465e-28
NM_008968	Ptgis	1751	-4.23655	4.72769	3.25555e-30	4.87914e-27
NM_153529	Nrn1	1622	-2.85101	6.96085	1.36449e-29	1.78935e-26
NM_007950	Ereg	4136	3.31249	5.16991	1.84718e-27	2.1532e-24
NM_013496	Crabp1	802	5.17928	4.84376	1.6977e-26	1.78106e-23
NR_003965	Gm10653	1232	-2.94359	7.1864	9.95063e-25	9.49019e-22
NM_033576	Pcdhgb4	4480	3.5335	4.43041	3.16453e-23	2.76659e-20
NM_023612	Esm1	2103	-3.1067	4.71154	5.07545e-23	4.09589e-20
NM_007562	Bnc1	4663	3.79445	3.87108	7.4467e-23	5.58024e-20
NM_026594	Rpl39l	805	5.38045	2.32032	4.0584e-22	2.83845e-19
NM_010460	Hoxb7	1269	4.15337	3.19242	1.1517e-21	7.55156e-19
NM_027052	Slc38a4	3932	-2.59418	7.6813	2.60054e-21	1.60484e-18
NM_007801	Ctsh	1623	-4.08955	4.65258	3.63873e-21	2.12077e-18
NM_001164528	Ildr2	8260	-2.68404	6.13175	3.73344e-20	2.06145e-17
NM_133187	Fam198b	6627	2.64687	7.68616	4.59032e-20	2.40785e-17
NM_011348	Sema3e	6861	2.96751	4.97793	6.55915e-20	3.27676e-17
NM_008270	Hoxb9	2699	4.31773	5.16024	7.90356e-20	3.76892e-17
NM_021456	Ces1g	2289	-3.62132	3.32087	1.34577e-19	6.13847e-17
NM_008709	Mycn	2596	3.75344	3.31486	4.98993e-19	2.18123e-16
NM_008269	Hoxb6	1322	3.71087	3.26302	2.33613e-18	9.80332e-16
NM_008268	Hoxb5	1896	3.59326	3.19278	5.87581e-18	2.37089e-15
NM_001008231	Daam2	6045	-2.4873	6.13521	9.44737e-18	3.67083e-15
NM_027924	Pdgfd	1795	3.57531	3.31475	1.27931e-17	4.79331e-15
NM_010258	Gata6	3194	-2.38003	5.74103	1.84845e-17	6.68693e-15
NM_008409	Itm2a	1632	3.55447	4.21432	2.63537e-17	9.2159e-15
NM_177906	Opcml	5992	-3.12546	3.49151	2.52843e-16	8.5567e-14
NM_013737	Pla2g7	1915	3.33286	4.48231	3.70059e-16	1.21322e-13
NM_011412	Slit3	4996	2.37533	7.56545	5.11831e-16	1.62716e-13
NM_021275	Kcna4	4844	-2.69458	4.4501	6.02683e-16	1.85963e-13
NM_011198	Ptgs2	4145	2.28906	7.39322	9.5991e-16	2.87726e-13
NM_153116	Gtpbp10	2932	-2.75553	4.01892	1.82141e-15	5.3079e-13
NM_026376	Plxnd1	6907	-2.13366	7.05403	2.80323e-15	7.94831e-13
NM_008137	Gna14	3383	-2.89577	3.98262	2.9895e-15	8.25339e-13
NM_010809	Mmp3	1800	3.57625	2.46352	8.50261e-15	2.2872e-12
NM_178793	Ccbe1	5742	3.8903	4.9415	1.14188e-14	2.99485e-12
NM_145449	Ifi27l2b	1093	5.20037	1.61796	5.20268e-14	1.33125e-11
NM_008926	Prkg2	4696	1.91604	6.02964	9.49152e-14	2.37084e-11
NM_172826	Dact2	2809	-2.53408	4.17218	1.78215e-13	4.34803e-11
NM_001033207	Nlrc5	6945	2.63628	4.64084	2.08368e-13	4.85775e-11
NM_013724	Nrk	6602	2.92678	5.37704	2.04765e-13	4.85775e-11
NM_024223	Crip2	1439	-2.51546	4.34569	2.52273e-13	5.75346e-11
NM_019732	Runx3	3891	2.50122	4.37508	2.9637e-13	6.61535e-11
NM_027268	Scrn1	1777	-2.3613	4.55637	3.58912e-13	7.84446e-11
NM_001081130	Ogdhl	3449	2.79887	3.18377	4.66688e-13	9.99189e-11
NM_018857	Msln	2115	3.61714	3.63273	5.02684e-13	1.05473e-10
NM_021384	Rsad2	3785	2.9291	3.62797	6.45877e-13	1.32861e-10
NM_019517	Bace2	3736	-2.87516	3.45817	1.30154e-12	2.62586e-10
NM_001025192	Cxadr	5566	3.08116	4.09172	2.04544e-12	4.04882e-10
NM_176973	Podxl2	2000	-2.57636	3.69968	2.41059e-12	4.68324e-10
NM_028973	Lrrc15	5308	2.64745	3.98967	2.65551e-12	5.06526e-10
NR_026942	E330013P04Rik	2070	-2.70383	3.40364	3.18105e-12	5.95936e-10
NM_010181	Fbn2	10480	3.18306	5.7909	3.7191e-12	6.8451e-10
NM_001098225	Adam22	9068	-2.53228	3.60811	3.93747e-12	7.12207e-10
NM_177595	Mkx	3201	2.80712	2.89166	4.43473e-12	7.88555e-10
NM_001085521	Syndig1	2055	-2.33132	3.96884	6.15883e-12	1.07687e-09
NM_175445	Rassf2	4785	-2.09537	5.98378	7.40423e-12	1.27341e-09
NM_172668	Lrp4	8028	-2.22929	4.65271	9.65656e-12	1.63398e-09
NM_025285	Stmn2	1904	3.86605	3.20473	1.5727e-11	2.61892e-09
NM_023850	Chst1	2682	-2.0713	4.8053	1.74674e-11	2.86329e-09
NM_181390	Mustn1	1179	-2.33395	3.87125	1.89181e-11	3.05338e-09
NM_011581	Thbs2	5922	-1.5911	10.2241	3.02322e-11	4.80554e-09
NM_009378	Thbd	3718	2.25344	6.93784	3.83783e-11	6.00936e-09
NM_172815	Rspo2	3340	-2.19038	5.0485	4.24189e-11	6.54437e-09
NM_009264	Sprr1a	790	-2.19497	5.2828	5.89658e-11	8.96537e-09
NM_010720	Lipg	3787	2.4286	3.87067	6.33869e-11	9.49988e-09
NM_029525	Prex2	11054	-2.2925	4.11075	7.55464e-11	1.11628e-08
NM_008548	Man1a	3889	1.97451	4.99828	8.15798e-11	1.18869e-08
NM_139001	Cspg4	8050	2.48173	3.94185	9.14432e-11	1.31415e-08
NM_021274	Cxcl10	1100	2.1914	4.59123	1.15226e-10	1.63356e-08
NM_008235	Hes1	1451	2.54541	4.06926	1.1979e-10	1.67562e-08
NM_010459	Hoxb4	2566	2.1374	4.45526	1.24638e-10	1.69816e-08
NM_020581	Angptl4	1903	2.49495	3.41636	1.23779e-10	1.69816e-08
NM_001081652	Nacad	4893	-2.01103	4.67618	1.39358e-10	1.87436e-08
NM_013743	Pdk4	3453	-2.25016	3.64614	1.42259e-10	1.88916e-08
NM_027853	Mettl7b	1227	3.2148	1.71134	1.64707e-10	2.15993e-08
NM_013553	Hoxc4	1983	1.70767	5.51468	2.01567e-10	2.61067e-08
NM_133764	Atp6v0e2	1834	-2.57752	2.42636	2.23399e-10	2.85815e-08
NM_008817	Peg3	6624	-4.07651	3.47003	2.46608e-10	3.11707e-08
NM_001162884	Igsf10	10084	2.38824	7.48232	2.71798e-10	3.39457e-08
NM_008398	Itga7	4020	2.97213	4.50357	2.94466e-10	3.63441e-08
NM_022322	Tnmd	1325	-3.50255	3.08279	3.08479e-10	3.76309e-08
NM_172285	Plcg2	4298	-2.1788	3.59169	3.54989e-10	4.28068e-08
NM_019790	Tmeff2	3339	2.57495	3.72171	3.95394e-10	4.71373e-08
NM_201518	Flrt2	7097	1.48562	7.67534	4.4615e-10	5.25906e-08
NM_009382	Thy1	1735	1.82959	9.39422	5.66993e-10	6.53662e-08
NM_028903	Scara5	3794	-2.71807	2.18575	5.6557e-10	6.53662e-08
NM_177914	Dgkk	7156	2.85616	4.08431	6.40983e-10	7.3093e-08
NM_008572	Mcpt8	839	3.19846	2.11038	7.93767e-10	8.9542e-08
NM_028696	Nabp1	2838	2.09927	4.08405	8.8485e-10	9.87549e-08
NM_010461	Hoxb8	2645	2.66185	3.36809	1.09929e-09	1.21397e-07
NM_011125	Pltp	1806	-2.29885	3.24595	1.15299e-09	1.26001e-07
NM_080448	Srgap3	8886	-1.85573	6.24196	1.25448e-09	1.35678e-07
NM_001039231	Zfp951	2903	2.25242	3.88135	1.49848e-09	1.60414e-07
NM_001167923	Col6a5	9297	-2.14947	3.50051	1.51526e-09	1.60572e-07
NM_021316	Cend1	1657	-3.01694	1.27552	1.7383e-09	1.82365e-07
NM_009655	Alcam	4959	1.66261	6.95344	1.9401e-09	2.01521e-07
NM_146028	Stac2	3049	-2.27371	3.55848	2.17527e-09	2.21561e-07
NM_172477	Dennd2a	4435	-1.48857	6.23391	2.15567e-09	2.21561e-07
NM_177794	Tmem26	5052	-2.4614	2.29736	2.21983e-09	2.23926e-07
NM_026672	Gstm7	1305	-2.18791	3.41311	2.39819e-09	2.39614e-07
NM_008115	Gfra2	3487	-1.53744	6.49393	2.83992e-09	2.81072e-07
NM_013723	Podxl	5330	2.14886	4.49014	2.96744e-09	2.90948e-07
NM_028448	Cenpv	1034	-2.11549	3.69961	3.02288e-09	2.93639e-07
NM_008909	Ppl	6277	-1.7821	4.8489	3.88175e-09	3.7361e-07
NM_001081125	Gli2	6708	1.99479	5.04899	3.97936e-09	3.79522e-07
NR_015533	A230057D06Rik	2004	-3.17836	1.27658	4.22081e-09	3.98924e-07
NM_009506	Vegfc	1881	2.04988	3.87922	4.41415e-09	4.13472e-07
NM_001025602	Il1rl1	5299	2.18576	6.39696	4.59885e-09	4.24517e-07
NM_010750	Mab21l1	2778	2.12545	3.36777	4.61299e-09	4.24517e-07
NM_175549	Robo2	8047	2.35429	3.21209	5.55537e-09	5.06795e-07
NM_031258	Chrdl1	4190	-3.09863	3.57207	5.69483e-09	5.15038e-07
NM_020265	Dkk2	3705	2.14804	4.51293	5.77224e-09	5.17577e-07
NM_010415	Hbegf	2375	1.65771	5.86502	6.29029e-09	5.59249e-07
NM_001081153	Unc13c	8079	-2.2913	4.42777	6.78908e-09	5.98523e-07
NM_133198	Pygl	2821	2.68853	1.73298	7.63686e-09	6.67653e-07
NM_033584	Pcdhga1	4537	2.89403	2.89244	8.17279e-09	7.08601e-07
NM_182809	Ntrk3	3832	-2.54816	1.78999	9.03752e-09	7.77152e-07
NM_021530	Slc4a8	11793	-1.73007	4.74175	1.12115e-08	9.56256e-07
NM_013599	Mmp9	3174	-2.10815	4.22621	1.18181e-08	9.99866e-07
NM_175730	Hoxc5	2730	1.46453	5.94423	1.21461e-08	1.0194e-06
NM_013665	Shox2	1592	1.51497	5.45907	1.24986e-08	1.04066e-06
NM_011213	Ptprf	7648	1.99423	5.3566	1.36481e-08	1.12742e-06
NM_011055	Pde3b	5286	1.59363	5.80027	1.45026e-08	1.18865e-06
NM_010380	H2-D1	1736	2.20818	4.8083	2.22369e-08	1.79681e-06
NM_011491	Stc2	1793	2.1241	3.03342	2.22653e-08	1.79681e-06
NM_016687	Sfrp4	1758	-2.50774	1.98777	2.37584e-08	1.88825e-06
NM_028841	Tspan17	1556	-1.8036	4.58235	2.35949e-08	1.88825e-06
NM_130878	Cdhr1	4304	-2.20441	3.73014	2.71513e-08	2.14168e-06
NM_010743	Il1rl1	3071	2.62507	7.15694	2.76531e-08	2.16499e-06
NM_033586	Pcdhga3	4691	2.29913	3.26534	3.0669e-08	2.38332e-06
NM_008610	Mmp2	3041	-1.64452	8.69188	3.2236e-08	2.48668e-06
NM_026660	Mfsd10	1827	1.52287	5.77603	3.30431e-08	2.53033e-06
NM_011824	Grem1	1639	1.40661	7.6938	3.43559e-08	2.61179e-06
NM_133990	Il13ra1	3685	1.52083	5.27248	3.93338e-08	2.96871e-06
NM_138665	Sardh	4558	-1.5779	5.78122	4.23333e-08	3.17227e-06
NM_009141	Cxcl5	1656	-1.30968	6.97743	5.57558e-08	4.14847e-06
NM_198095	Bst2	766	3.15023	5.59108	5.63729e-08	4.16484e-06
NM_010474	Hs3st1	1685	3.06239	1.57259	6.32616e-08	4.6411e-06
NM_011542	Tcea3	1247	-2.14778	2.47193	7.15344e-08	5.21158e-06
NM_020557	Cmpk2	3189	2.16756	4.1325	7.54988e-08	5.46247e-06
NM_145144	Aif1l	2953	2.20317	4.7027	7.91193e-08	5.68521e-06
NM_010140	Epha3	3978	2.53274	1.86233	9.20286e-08	6.56783e-06
NM_027711	Iqgap2	5771	1.99698	3.34066	9.85891e-08	6.9885e-06
NM_183029	Igf2bp2	3899	1.31418	7.40649	1.05684e-07	7.44115e-06
NM_139198	Plac8	696	1.60142	7.21675	1.09022e-07	7.62501e-06
NM_010444	Nr4a1	2476	2.24203	5.44297	1.14337e-07	7.9438e-06
NM_011267	Rgs16	2335	1.52426	4.86744	1.34441e-07	9.27911e-06
NM_021458	Fzd3	12742	1.73336	4.63907	1.49039e-07	1.02194e-05
NM_010345	Grb10	5089	1.70489	4.89112	1.69963e-07	1.15784e-05
NM_001277149	Chd7	11306	1.709	4.02151	1.85961e-07	1.25866e-05
NM_001098528	Kcnb2	5309	2.49402	1.44116	1.93635e-07	1.30219e-05
NM_001033272	Spata13	7517	1.29652	6.32961	2.00797e-07	1.34176e-05
NM_001001892	H2-K1	1646	2.36028	5.24176	2.20931e-07	1.45773e-05
NM_153393	Col23a1	5665	-1.96599	4.06643	2.20548e-07	1.45773e-05
NM_177089	Tacc1	7788	-1.73449	5.12029	2.63862e-07	1.73011e-05
NM_009447	Tuba4a	2053	1.52211	4.73442	2.75251e-07	1.7895e-05
NM_010145	Ephx1	1665	-1.45136	6.00769	2.7633e-07	1.7895e-05
NM_008046	Fst	2558	1.59004	5.53327	2.8094e-07	1.80819e-05
NM_010713	Lhx8	1977	2.3139	2.27123	2.88555e-07	1.84587e-05
NM_019588	Plce1	9509	-1.83254	4.21256	3.10243e-07	1.96473e-05
NM_178396	Car12	3716	2.24805	1.8309	3.10881e-07	1.96473e-05
NM_008549	Man2a1	6078	-1.20109	8.98618	3.383e-07	2.12521e-05
NM_172296	Dmrta2	2947	1.94858	4.03217	3.50282e-07	2.18738e-05
NM_010362	Gsto1	1161	1.31925	8.41178	3.56592e-07	2.21362e-05
NM_001161665	Kif26b	7406	1.39045	5.4342	3.70885e-07	2.2888e-05
NM_001134480	Plcxd2	7337	1.606	4.15704	3.7455e-07	2.2979e-05
NM_025949	Rps6ka6	4683	2.55898	2.83466	4.39909e-07	2.68319e-05
NM_029595	Pbp2	1256	2.42889	1.98018	4.58118e-07	2.7781e-05
NM_028980	Ppp4r4	3683	2.20395	2.52436	4.69689e-07	2.8319e-05
NM_133903	Spon2	2237	-2.0167	5.30287	4.86148e-07	2.91439e-05
NM_025685	Col27a1	7634	1.86312	3.98554	4.96736e-07	2.96094e-05
NM_028572	Vgll3	3331	1.2346	7.50971	5.25824e-07	3.11321e-05
NM_177698	Psd3	11316	-2.04196	5.19286	5.28216e-07	3.11321e-05
NM_008858	Prkd1	3777	1.23779	6.23855	5.39164e-07	3.15998e-05
NM_010662	Krt13	1314	-2.5469	1.41689	5.64391e-07	3.27408e-05
NM_019483	Smad9	5380	-1.69445	4.31774	5.64873e-07	3.27408e-05
NM_177897	B4galnt4	3105	1.92272	2.93316	5.78849e-07	3.33665e-05
NM_010517	Igfbp4	2066	1.80639	4.523	6.41552e-07	3.67788e-05
NM_008671	Nap1l2	2606	2.0993	2.1021	6.47849e-07	3.6938e-05
NM_011448	Sox9	4146	-1.3927	6.72863	6.77682e-07	3.84301e-05
NM_053105	Klhl1	4048	-2.44126	2.19944	6.81589e-07	3.84438e-05
NM_010942	Nsg1	2140	1.82885	4.66053	7.06723e-07	3.96483e-05
NM_001165999	Lingo2	4641	2.41049	1.92076	7.8984e-07	4.40756e-05
NM_007738	Col7a1	9198	1.23574	6.80589	8.3305e-07	4.62409e-05
NM_008216	Has2	4244	1.34672	5.93985	8.48837e-07	4.68692e-05
NM_053140	Pcdhb15	2795	2.22903	2.11049	8.6327e-07	4.74166e-05
NM_011812	Fbln5	5893	1.53232	6.44262	9.58219e-07	5.22397e-05
NM_026416	S100a16	1061	-2.02657	2.2934	9.61039e-07	5.22397e-05
NM_177034	Apba1	6632	-1.57662	4.42552	1.12772e-06	6.09841e-05
NM_013653	Ccl5	531	2.47039	4.5373	1.20908e-06	6.50485e-05
NM_138741	Sdpr	3055	1.26563	8.10233	1.24907e-06	6.68573e-05
NM_019946	Mgst1	943	-1.29343	6.16488	1.34791e-06	7.17813e-05
NM_025374	Glo1	1939	-1.27522	6.0037	1.50894e-06	7.92689e-05
NM_031185	Akap12	6247	-1.19893	8.58278	1.51118e-06	7.92689e-05
NM_133930	Creld1	2034	-1.72353	3.67182	1.49837e-06	7.92689e-05
NM_133888	Smpdl3b	1925	1.51663	4.17779	1.63483e-06	8.53281e-05
NM_001113384	Gnao1	6005	-1.28502	6.76603	1.67823e-06	8.716e-05
NM_001077354	C77370	10890	1.72554	3.63273	1.78438e-06	9.22165e-05
NM_007428	Agt	1839	-2.78155	4.41572	1.80183e-06	9.26618e-05
NM_019432	Tmem37	1017	-1.98578	2.28347	1.84532e-06	9.44353e-05
NM_030209	Crispld2	4150	1.67142	3.62688	1.8901e-06	9.62576e-05
NM_134032	Hoxb2	1629	1.64663	4.41932	2.03836e-06	0.000103307
NM_008795	Cdk18	3046	-1.53924	5.27352	2.1187e-06	0.000106745
NM_019696	Cpxm1	2421	2.4935	5.47156	2.12657e-06	0.000106745
NM_009142	Cx3cl1	3143	-1.32922	6.38681	2.17791e-06	0.000108802
NR_015521	1700030C10Rik	1724	1.85596	2.73649	2.27999e-06	0.000113362
NM_030152	Nol3	2869	-1.88938	2.74285	2.31205e-06	0.000114414
NM_007974	F2rl1	2757	2.1027	3.65803	2.32776e-06	0.000114651
NM_008032	Aff2	4486	1.8226	3.43359	2.47571e-06	0.000121368
NM_010582	Itih2	3122	-1.51537	4.33253	2.60701e-06	0.00012721
NM_010305	Gnai1	3193	1.89311	2.90607	2.69809e-06	0.000131045
NM_175369	Ccdc122	1721	-1.58744	3.71846	2.96006e-06	0.000143106
NM_001081333	Plekhg4	4167	-1.5069	4.70713	3.01503e-06	0.000145095
NM_178638	Tmem108	3692	2.02721	2.13669	3.13878e-06	0.000150361
NM_025564	Magohb	766	-1.6351	3.79195	3.55726e-06	0.000169633
NM_138952	Ripk2	1901	-1.16444	6.2862	3.57964e-06	0.000169927
NM_028176	Cda	809	-1.68689	3.24613	3.74111e-06	0.000176556
NM_172771	Dmxl2	10614	1.76597	3.32314	3.75294e-06	0.000176556
NM_008760	Ogn	2540	-1.69415	7.49892	4.02153e-06	0.000188348
NM_009622	Adcy1	12258	-1.50743	4.50129	4.43481e-06	0.00020678
NM_023627	Isyna1	1838	-1.41736	4.69159	4.54918e-06	0.000211175
NM_011909	Usp18	1771	3.87759	4.1796	4.58522e-06	0.00021191
NM_145711	Tox	2852	2.53305	2.57792	5.02445e-06	0.000231191
NM_021604	Agrn	7379	1.57879	5.53263	5.15328e-06	0.000236083
NM_010194	Fes	2762	1.80521	3.30884	5.30473e-06	0.000241189
NM_177879	Sdk1	8513	1.77819	3.36899	5.31071e-06	0.000241189
NM_001024474	Diras2	4348	-1.85813	4.21927	5.42181e-06	0.000245174
NM_001162864	Ttbk1	6959	-1.68663	3.99673	5.64527e-06	0.000254183
NM_001033481	Myrf	5597	-1.75616	3.16995	5.88067e-06	0.00026365
NM_023386	Rtp4	1573	3.14122	4.74697	5.95488e-06	0.00026525
NM_025626	Fam107b	3148	1.06441	7.17542	5.96692e-06	0.00026525
NM_145155	Wasf3	2685	-1.48528	4.13456	6.17525e-06	0.000273352
NM_029935	Chst15	4265	1.37523	5.05835	6.27025e-06	0.000276391
NM_011607	Tnc	7100	1.28941	10.4247	6.56137e-06	0.000288014
NM_011854	Oasl2	3136	3.18459	5.15213	7.27024e-06	0.0003178
NM_011577	Tgfb1	2094	1.65556	3.55588	7.36617e-06	0.000319333
NM_194334	Tbc1d2b	5934	-1.12997	7.87396	7.35359e-06	0.000319333
NM_024495	Car13	2299	-1.16713	6.6831	7.6625e-06	0.000330812
NM_018884	Pdzrn3	4106	1.17617	7.31622	7.77439e-06	0.000334267
NM_172854	Olfml2a	2409	-2.07994	1.77831	8.34957e-06	0.000357532
NM_144867	Slmo1	2167	1.7751	2.66115	8.49975e-06	0.000362483
NM_001039530	Parp14	7251	2.69405	5.27479	8.72839e-06	0.000370727
NM_013494	Cpe	2093	-1.02979	8.84968	9.68747e-06	0.000409803
NM_010496	Id2	1272	-1.2893	5.15678	1.00325e-05	0.000422696
NM_007453	Prdx6	2334	1.06291	7.58391	1.03609e-05	0.000434786
NM_019634	Tspan7	1774	1.74221	3.90784	1.07408e-05	0.000448929
NM_019963	Stat2	4394	1.83259	5.37689	1.09481e-05	0.000455779
NM_007609	Casp4	1432	2.26386	3.35533	1.25266e-05	0.000519435
NM_133674	Arhgef5	5407	1.06534	6.36675	1.28394e-05	0.000530307
NM_019967	Brinp1	3354	2.19469	1.95549	1.31558e-05	0.00053913
NM_026189	Eepd1	2673	2.10593	1.35021	1.31338e-05	0.00053913
NM_010132	Emx2	2598	-1.51091	5.41281	1.3345e-05	0.000544757
NM_133982	Rpp25	1346	-1.76751	2.26462	1.34021e-05	0.000544965
NM_001025606	Tmem171	1155	2.04508	3.61824	1.35042e-05	0.000546999
NM_022410	Myh9	7435	-1.13671	10.8128	1.37331e-05	0.00055413
NM_008803	Pde8a	2683	1.44011	4.1791	1.4216e-05	0.000571418
NM_172488	Lacc1	2419	-1.33136	4.32481	1.47134e-05	0.000589156
NM_008716	Notch3	7943	-1.21746	4.91786	1.48683e-05	0.000593094
NM_172588	Serinc5	5318	-1.08864	6.23556	1.50072e-05	0.000596365
NM_013589	Ltbp2	6603	1.37235	7.85017	1.59485e-05	0.000631379
NM_030725	Syt13	3751	-1.61611	4.26008	1.67348e-05	0.00066002
NM_001002268	Gpr126	6505	1.18033	5.45836	1.69449e-05	0.000663316
NM_025429	Serpinb1a	1918	-2.01015	3.13647	1.68821e-05	0.000663316
NM_153098	Cd109	5867	-1.11026	6.46773	1.77101e-05	0.000690693
NM_145953	Cth	1801	1.23976	5.62759	1.7964e-05	0.000698003
NM_031174	Dscam	7480	-1.34996	4.47401	1.83835e-05	0.000711663
NM_001113379	Lrrc32	3816	-1.63297	5.76087	1.86346e-05	0.000718735
NM_011041	Pax9	2574	1.98598	1.38378	1.91604e-05	0.000734025
NM_011211	Ptprd	9127	-1.21134	5.17783	1.9171e-05	0.000734025
NM_207205	Igsf3	7330	-1.12091	6.19044	1.95865e-05	0.000747207
NM_139298	Wnt9a	3318	1.70697	2.25144	1.98106e-05	0.00075302
NM_001044308	Cacna1i	9794	-1.34914	4.63366	1.99627e-05	0.000756058
NM_001081300	Tshz1	5814	1.04665	7.14541	2.04139e-05	0.000770369
NM_030143	Ddit4l	2721	-1.813	2.31404	2.06203e-05	0.000774404
NM_172647	F11r	2482	1.62125	3.83321	2.06685e-05	0.000774404
NM_026821	Lurap1l	1699	1.31222	4.88294	2.1238e-05	0.000792912
NR_002863	Emx2os	5023	-1.20559	4.91866	2.20698e-05	0.000821042
NM_183162	Helz2	10109	1.81934	6.05503	2.23657e-05	0.000829111
NM_028623	Cst6	3951	-1.96515	4.06366	2.26575e-05	0.00083697
NM_010158	Khdrbs3	1893	1.09044	5.95314	2.31729e-05	0.000853008
NM_148933	Slco4a1	3087	2.02417	3.62523	2.34022e-05	0.000858434
NM_009546	Trim25	5563	1.47647	5.70151	2.36803e-05	0.00086561
NM_172631	Ldlrad4	2493	1.38957	4.61378	2.38058e-05	0.000867177
NM_008331	Ifit1	2638	2.16655	6.3743	2.39122e-05	0.000868037
NM_001033141	Ecscr	1111	1.85476	1.99688	2.43209e-05	0.000879831
NM_001025576	Ccdc141	6329	-1.67243	4.36609	2.44111e-05	0.000880059
NM_011477	Sprr2k	639	-2.19612	2.35627	2.46598e-05	0.000885979
NM_009693	Apob	13909	1.67363	2.74955	2.65788e-05	0.000951668
NM_010260	Gbp2	2455	2.13603	4.662	2.87839e-05	0.0010212
NM_026681	Ccdc88c	6292	1.73809	2.54275	2.87158e-05	0.0010212
NM_177271	Samd5	2495	1.92722	2.2113	2.88129e-05	0.0010212
NM_133778	Fam131a	2271	-1.66801	2.41062	2.9497e-05	0.00104193
NM_009396	Tnfaip2	3570	1.01296	7.41434	3.02436e-05	0.00106472
NR_033599	Gm6682	1343	-1.47508	3.56911	3.07276e-05	0.00107814
NR_001592	H19	2615	1.97776	4.06641	3.10257e-05	0.00108497
NM_001024720	Hmcn1	18314	2.14484	3.65677	3.15613e-05	0.00109642
NM_008167	Grid2	3024	2.2728	2.09171	3.15621e-05	0.00109642
NM_009616	Adam19	6395	-1.02582	6.78411	3.23441e-05	0.00111987
NM_019656	Tspan6	1763	-1.20881	5.93921	3.32407e-05	0.00114713
NM_001012401	Hspb6	1325	-1.2102	5.01977	3.33972e-05	0.00114875
NM_194355	Spire1	5033	1.82118	1.80701	3.41796e-05	0.00116801
NR_102396	C130046K22Rik	3313	1.92279	1.51575	3.41426e-05	0.00116801
NM_019676	Plcd1	2656	-1.18011	4.93254	3.43126e-05	0.00116874
NM_134156	Actn1	3739	0.992986	9.06838	3.45628e-05	0.00117346
NM_010466	Hoxc8	2369	-1.06998	5.89763	3.59856e-05	0.00121782
NM_133765	Fbxo31	4355	-1.01972	6.17735	3.65152e-05	0.00123177
NM_018779	Pde3a	4205	-1.59014	2.93264	3.72611e-05	0.0012529
NM_013886	Hdgfrp3	5868	1.42541	5.22622	3.78885e-05	0.00126993
NM_030206	Cygb	2331	-1.67698	2.41317	4.15348e-05	0.00138771
NM_030166	Galnt15	2341	-1.57394	3.07147	4.23764e-05	0.00141134
NM_013614	Odc1	2547	1.01682	8.63517	4.29444e-05	0.00142573
NM_013867	Bcar3	3300	-1.67789	2.9079	4.4832e-05	0.00148196
NM_026455	Fam32a	1921	1.03973	6.07674	4.49207e-05	0.00148196
NM_133871	Ifi44	2908	3.85704	4.83135	4.5107e-05	0.00148344
NM_207000	H2afy2	1910	-1.21968	4.56731	4.6468e-05	0.00152343
NM_172563	Hlf	5665	1.35366	4.16657	4.67116e-05	0.00152664
NM_009593	Abcg1	5818	-1.35095	4.4739	4.69637e-05	0.00153011
NM_001025246	Trp53i11	2662	1.4857	3.1652	4.95742e-05	0.00161016
NM_172805	Kcnh5	4061	-2.20108	2.9408	5.28724e-05	0.00171199
NM_177819	Fam135b	4623	-1.86643	2.80614	5.38275e-05	0.00173755
NM_010469	Hoxd4	2559	1.48074	3.69713	5.50837e-05	0.00177265
NM_026162	Plxdc2	6947	1.8768	3.75877	5.59764e-05	0.00179587
NM_030889	Sorcs2	5721	1.65413	4.08003	5.71589e-05	0.00182821
NM_001033767	Gm4951	2648	2.14144	2.28642	5.74288e-05	0.00183126
NM_016753	Lxn	1092	1.07587	6.02757	5.94192e-05	0.00188899
NM_010501	Ifit3	1998	2.53638	4.19183	6.18256e-05	0.00195365
NM_183183	Gprin3	3100	-1.96345	3.5036	6.17463e-05	0.00195365
NM_008149	Gpam	3828	-1.03227	6.05483	6.58029e-05	0.00207309
NM_008168	Grik5	3838	-1.49914	4.59296	6.71785e-05	0.00211009
NM_007792	Csrp2	889	-1.2675	4.81245	6.84215e-05	0.00213634
NM_028030	Rbpms2	1956	1.57373	5.42843	6.82606e-05	0.00213634
NM_007874	Reep5	2897	1.04532	6.74882	7.03819e-05	0.00219103
NM_009450	Tubb2a	1607	-0.947978	6.66154	7.24584e-05	0.002249
NM_010451	Hoxa2	1775	1.37204	3.30148	7.31934e-05	0.00226511
NM_011898	Spry4	4590	1.49213	5.29539	7.64008e-05	0.00235741
NM_001024624	Cdkl5	3246	1.53171	2.69191	7.72006e-05	0.00237511
NM_011019	Osmr	4835	1.04417	7.53086	7.86029e-05	0.00241118
NM_027455	Qpct	1924	-1.45641	3.02002	7.99959e-05	0.00244676
NM_008377	Lrig1	4966	0.946051	7.85477	8.12438e-05	0.0024777
NM_001199113	Slc29a1	2094	-1.5207	2.27173	8.18135e-05	0.00248684
NM_009538	Plagl1	5261	1.73734	3.41322	8.20175e-05	0.00248684
NM_021422	Dnaja4	3005	1.71524	3.12991	8.51607e-05	0.0025747
NM_172884	2900026A02Rik	5838	-1.27136	5.39234	8.57865e-05	0.00258617
NM_009154	Sema5a	10809	-1.03589	7.63565	8.64738e-05	0.00259942
NR_015543	Mir99ahg	3151	-1.77171	2.85438	8.76926e-05	0.00262852
NM_153778	Atoh8	2354	-1.31065	4.1336	8.88621e-05	0.00265599
NM_033314	Slco2a1	4033	-1.02345	6.00196	8.92323e-05	0.00265948
NM_001114332	Slc16a10	5394	1.40155	3.2041	9.08945e-05	0.00270134
NM_052976	Ophn1	3932	-1.24107	4.49247	9.51423e-05	0.0028196
NM_181820	Tmc4	2346	-1.65011	1.76801	9.96155e-05	0.00294385
NM_023844	Jam2	4817	-1.66512	3.34381	0.000100583	0.00296408
NM_001290308	Col12a1	11719	1.68346	9.32115	0.000101477	0.00298205
NM_009510	Ezr	3070	-1.2275	5.54795	0.000103136	0.00301843
NM_172468	Snx30	7507	1.0057	5.77283	0.00010329	0.00301843
NM_134188	Acot2	2198	1.41608	3.37828	0.000105961	0.00308787
NM_133891	Slc44a1	3102	-1.45809	3.9572	0.000108624	0.00315673
NM_009369	Tgfbi	2678	-1.36235	6.21746	0.000112622	0.00326386
NM_177250	Lingo4	2943	-1.60931	2.30127	0.00011429	0.00330307
NM_029102	Glt8d2	2153	-1.48589	4.46286	0.000115758	0.00333632
NM_011212	Ptpre	5411	1.40006	3.17757	0.000116377	0.00334497
NM_008086	Gas1	3131	-1.04464	9.63424	0.000124412	0.00355642
NM_139140	Spats2	2058	0.993101	5.77524	0.000124244	0.00355642
NM_183221	Fat4	16107	-1.72324	8.56446	0.000124902	0.00356072
NM_011056	Pde4d	7049	0.907749	6.59703	0.000125872	0.00357866
NM_029011	Pyroxd2	3119	-1.45306	3.27091	0.000133379	0.00377758
NM_175358	Zdhhc15	5508	1.55141	2.67638	0.000133589	0.00377758
NM_001033167	Slc22a23	6251	1.29028	3.59126	0.000136549	0.00384075
NM_173007	Tspan12	2490	1.95269	1.71575	0.000136555	0.00384075
NM_031176	Tnxb	9569	-1.14342	4.81619	0.000137653	0.00386126
NM_001081432	Ptprq	7058	1.77869	2.37478	0.00013838	0.00387132
NM_033577	Pcdhgb5	4522	1.97752	3.02669	0.000139337	0.00388772
NM_025817	Tril	5358	-1.46882	3.6531	0.000139969	0.00389499
NM_007679	Cebpd	2260	1.06481	5.49975	0.000140665	0.00390401
NM_008989	Pura	1601	1.01688	5.51824	0.000141267	0.00391037
NM_001081235	Mn1	6128	-0.962273	6.01267	0.00014429	0.00398355
NM_009982	Ctsc	2472	1.79405	1.65972	0.00015358	0.00422888
NM_172393	Aim1	7416	-1.39604	6.33117	0.000155231	0.00426317
NM_146126	Sord	2259	-1.02479	5.30059	0.00015641	0.00428432
NM_009177	St3gal1	5784	0.892757	7.1106	0.000173947	0.00472798
NM_009251	Serpina3g	2004	1.7432	3.25413	0.000174068	0.00472798
NM_010330	Emb	2622	-1.02859	7.1158	0.000174181	0.00472798
NM_145158	Emilin2	3910	-0.916294	7.76243	0.000174409	0.00472798
NM_026940	Ydjc	1320	1.83342	2.05799	0.000185779	0.00502323
NM_025992	Herc6	5279	1.2934	4.91916	0.000186745	0.00503635
NM_033589	Pcdhga6	4540	1.55373	3.61817	0.00018787	0.00505369
NM_007620	Cbr1	1081	1.23505	4.25262	0.000189232	0.00507731
NM_030174	Mctp1	4289	-1.30075	3.92358	0.000198991	0.00532555
NM_033574	Pcdhgb1	4498	1.65778	2.64275	0.000202628	0.00540908
NM_013654	Ccl7	799	-0.86217	7.81665	0.000206113	0.00548814
NM_011578	Tgfbr3	6053	0.971304	8.06118	0.000206677	0.00548925
NM_007963	Mecom	4429	0.965062	5.46069	0.000207692	0.00550226
NM_025378	Ifitm3	648	1.12282	7.6194	0.000214204	0.00566049
NM_023158	Cxcl16	2448	-1.64122	2.1512	0.000215025	0.0056679
NM_178856	Gins2	1038	-0.955192	6.03792	0.000215969	0.00567854
NM_181397	Rftn1	2802	1.34284	5.71039	0.000217334	0.00570012
NM_177839	Tnn	5809	1.55199	2.95835	0.00022059	0.00575674
NM_197988	1190005I06Rik	734	-1.51415	1.9212	0.000220457	0.00575674
NM_183287	2610318N02Rik	1266	1.6517	1.63675	0.000226957	0.0059082
NM_019564	Htra1	2039	0.977463	7.00706	0.000235232	0.00610846
NM_001081215	NA	NA	1.7805	3.34496	0.000240677	0.00623442
NM_053090	Fam126a	5647	0.907246	6.64289	0.000242387	0.00626327
NM_013605	Muc1	2243	1.36722	2.71671	0.000247554	0.00636543
NM_030609	Hist1h1a	745	-0.890131	9.2362	0.000247134	0.00636543
NM_009099	Trim30a	3770	3.11068	4.14138	0.000254001	0.00651521
NM_153582	Cmtm4	7732	-0.923102	7.82337	0.000256009	0.0065507
NM_001195681	Gm684	1263	1.57446	1.67073	0.000262465	0.00669956
NM_008380	Inhba	1529	1.24267	5.19631	0.000266576	0.00678799
NM_008967	Ptgir	3334	-1.18231	3.76706	0.00026799	0.00680747
NM_007934	Enpep	4208	-1.50276	2.55443	0.000272691	0.00691016
NM_007568	Btc	2876	-1.54139	2.41265	0.000275675	0.00696893
NM_009735	B2m	858	0.99073	10.0719	0.000280159	0.00706526
NM_145515	Mark1	4565	1.22144	3.74342	0.000282348	0.00710338
NM_054053	Gpr98	19328	-1.27683	3.44599	0.00028367	0.00711958
NM_008764	Tnfrsf11b	2818	-1.37598	3.02055	0.000287456	0.00718024
NM_016854	Ppp1r3c	2676	-1.46709	3.23925	0.000287106	0.00718024
NM_001033217	Prickle1	4085	1.13712	4.1782	0.000291266	0.00725813
NM_001100449	Taf4b	5149	1.26385	4.23191	0.000292827	0.00727974
NM_010358	Gstm1	1294	-0.844576	7.12625	0.000298782	0.00741022
NM_145508	Dyrk3	2072	1.44838	2.21966	0.000306992	0.00759589
NM_027335	2210016F16Rik	2822	1.11311	4.44739	0.000315974	0.0077839
NM_033580	Pcdhgb8	4617	1.60357	3.17701	0.000316075	0.0077839
NM_176848	Fbxo2	1234	-1.52264	3.24788	0.000316958	0.00778737
NM_139299	Il31ra	3667	2.16068	3.87999	0.000318521	0.00780749
NM_013566	Itgb7	2674	1.62222	3.60969	0.000322161	0.0078783
NM_008326	Irgm1	2227	1.54714	5.31565	0.000329531	0.0080398
NM_144899	Adamtsl4	3917	-1.05939	6.27017	0.000338516	0.00823984
NM_177805	Fam179b	6434	0.890864	6.24828	0.000341492	0.00829305
NM_030565	Fam20c	3001	-1.21413	3.96542	0.000344101	0.0083371
NM_010156	Samd9l	5329	1.64166	6.07551	0.000345546	0.00835281
NM_007737	Col5a2	6615	0.93871	9.42711	0.00035517	0.00854607
NM_175935	G6pc3	1544	1.06938	5.05702	0.00035485	0.00854607
NM_012043	Islr	2227	-1.73034	1.60939	0.000361141	0.00866977
NM_030695	Lrba	9883	1.46	2.24697	0.000361963	0.00866977
NM_021409	Pard6b	3399	1.45756	2.9175	0.000374052	0.00891859
NR_110496	A330074K22Rik	2489	-1.13628	4.72074	0.000374042	0.00891859
NM_009144	Sfrp2	2001	-2.08077	9.20778	0.000375738	0.00893847
NM_009399	Tnfrsf11a	5022	1.23867	4.06652	0.000381997	0.00905832
NM_009500	Vav2	3482	-0.998066	4.96606	0.000382503	0.00905832
NM_010299	Gm2a	4256	-0.988154	5.1407	0.000389141	0.00919476
NM_001097644	Ccnyl1	2925	0.914873	5.65555	0.000405633	0.00956291
NM_008711	Nog	1922	1.72792	2.76776	0.000418181	0.00983664
NM_028472	Bmper	3806	1.27853	3.17662	0.000423128	0.00993073
NM_026738	1110007C09Rik	804	-1.01283	5.59437	0.000430277	0.010076
NM_177340	Synpo	5012	0.997397	5.44098	0.000438162	0.0102378
NM_016794	Vamp8	786	-0.895982	6.20523	0.000440852	0.0102777
NM_009367	Tgfb2	4725	-1.04525	4.9868	0.000453669	0.0105531
NM_080451	Synpo2	7116	-1.26544	4.4582	0.000461313	0.0107072
NM_023402	Myl12b	939	-0.8587	6.92141	0.00047502	0.011001
NM_008343	Igfbp3	2440	-1.75029	3.65794	0.000493251	0.0113811
NM_011380	Six2	2108	1.20291	3.31027	0.000493604	0.0113811
NM_174857	Mamdc2	3338	1.45079	2.14241	0.000530133	0.0121966
NM_010441	Hmga2	4176	0.980005	9.14683	0.000544239	0.0124937
NM_001081278	Tbc1d4	6641	-0.955294	5.1482	0.000550223	0.0126035
NM_178929	Kazald1	1380	-1.27821	2.75238	0.000558501	0.0127652
NM_001159910	Ccdc85c	1547	1.25397	3.82206	0.000562802	0.0128356
NM_021454	Cdc42ep5	864	1.4144	4.03616	0.000568057	0.0129273
NM_001113204	Ncam1	6985	1.51224	2.96782	0.000574247	0.0130399
NM_001163637	Jakmip2	3511	1.11637	3.93604	0.000597431	0.013537
NR_026733	3110039M20Rik	854	2.32131	2.15114	0.00061906	0.0139969
NM_010398	H2-T23	1317	-1.19442	4.03279	0.000628735	0.0141851
NM_020270	Scamp5	3227	-1.08333	4.12697	0.00063864	0.0143776
NM_001199136	Macf1	23495	-1.01365	6.58409	0.000643985	0.0144669
NM_144533	Nmnat3	2160	1.32229	3.09003	0.000656139	0.0147084
NM_011338	Ccl9	3008	-0.982002	5.54178	0.000665553	0.014856
NM_011896	Spry1	2490	1.02218	6.88283	0.000665378	0.014856
NM_027642	Phf6	4420	-1.65766	1.18342	0.000674982	0.0150345
NM_011985	Mmp23	1434	-1.2434	4.96111	0.000691659	0.0153733
NM_009626	Adh7	2079	1.27978	5.0894	0.000702108	0.0155725
NM_053142	Pcdhb17	3270	1.00829	4.71764	0.000705073	0.0156053
NM_029197	Meiob	1703	-1.48018	1.36433	0.000714001	0.0157696
NM_007993	Fbn1	9900	0.896739	9.25889	0.000718506	0.0157779
NM_027950	Osgin1	1961	-1.06581	4.40444	0.000716859	0.0157779
NM_028011	Tom1l1	2093	1.2302	3.91451	0.000718887	0.0157779
NM_030253	Parp9	3564	1.65777	5.1941	0.000731108	0.0160126
NM_028934	4930452B06Rik	2751	-1.18213	3.73204	0.00073693	0.0161065
NM_023184	Klf15	2294	-1.74503	3.00604	0.000748419	0.0163236
NM_175212	Tmem65	3644	-0.794757	7.28748	0.000769418	0.0167468
NM_013912	Apln	3148	-0.908032	5.73248	0.000802164	0.0174234
NM_019800	Acp6	1756	0.975311	4.678	0.000813271	0.0176282
NM_008029	Flt4	5839	1.70176	3.02287	0.000820542	0.0177491
NM_026056	Cap2	3658	-1.12949	4.6605	0.000828746	0.0178896
NR_110420	Ptgs2os2	1745	1.35746	2.8198	0.000846438	0.0182341
NM_054056	Pawr	1828	-0.933315	5.65654	0.000882776	0.0189779
NM_001003911	Adamts7	5346	1.10311	4.67668	0.000887331	0.0190115
NM_011973	Mok	1693	1.5467	1.62875	0.000887964	0.0190115
NM_029352	Dusp9	2700	1.2227	3.10882	0.000897294	0.0191721
NM_177628	Fam167a	4235	1.26194	2.67715	0.000914564	0.0195014
NM_172770	Ttc12	3630	1.38137	1.95505	0.000928964	0.0197683
NM_021377	Sorcs1	7240	-1.64794	1.59922	0.000936414	0.0198865
NM_175514	Fam171b	3394	-0.836701	5.77511	0.00094391	0.0200052
NM_011627	Tpbg	3618	1.65505	1.99457	0.00094585	0.0200059
NM_019511	Ramp3	1221	1.70591	2.24006	0.000951014	0.0200746
NM_008482	Lamb1	5778	0.797272	9.15842	0.000980203	0.0206492
NM_007729	Col11a1	7275	1.22365	6.73289	0.000992565	0.0208677
NM_080640	Baalc	3967	1.34093	2.86339	0.0010074	0.0211373
NM_010478	Hspa1b	2810	-0.905198	5.47952	0.00102345	0.0214311
NM_019990	Stard10	1198	-1.26962	3.11127	0.00102631	0.0214483
NM_145624	Zfp709	3975	1.32287	2.07877	0.0010319	0.0215223
NM_028785	Dock8	7810	1.23123	3.06589	0.00104425	0.0217366
NM_172418	Mamstr	2179	-1.40198	1.53022	0.00109111	0.0226671
NM_178407	Arap2	7362	1.2626	2.73352	0.00110963	0.0230061
NM_146236	Tceal1	1108	-1.40606	2.11172	0.00112348	0.0232474
NM_201244	Copg1	877	-1.19566	3.0255	0.00112624	0.0232585
NM_008449	Kif5c	6840	-0.883581	5.46126	0.00114303	0.0235591
NM_172293	Pced1b	2200	1.25407	2.55848	0.00114916	0.0236388
NM_177047	Auts2	6059	-1.01074	4.89981	0.00115265	0.0236643
NM_146007	Col6a2	3729	-0.907302	9.56802	0.0011715	0.0239575
NM_175285	Tmem62	2866	-1.10334	3.75081	0.00116933	0.0239575
NM_009601	Chrnb1	2149	1.22701	3.40736	0.00118475	0.0241814
NM_020568	Plin4	5755	-1.10089	3.7981	0.00118799	0.0242005
NM_010726	Phyh	1474	-1.29946	2.92227	0.00121316	0.0246653
NM_001164805	Thsd7a	11000	-0.964359	5.16449	0.00121659	0.0246872
NM_016846	Rgl1	3887	0.785871	6.3935	0.00124892	0.0252942
NM_021491	Smpd3	5148	-0.967649	5.20485	0.00125535	0.0253754
NM_008478	L1cam	5288	-1.52927	4.10624	0.00126518	0.0255251
NM_009354	Tert	3426	-1.21551	4.02008	0.00127589	0.0256918
NM_001008421	Nol10	2986	0.907552	5.63797	0.00128034	0.0257231
NM_011706	Trpv2	2751	-1.41374	2.20562	0.00128241	0.0257231
NM_172900	Siglecg	2484	-1.17434	4.4037	0.00128481	0.0257231
NM_009167	Shc3	1536	-1.41789	1.43309	0.00129994	0.0259766
NM_010593	Jup	5009	-0.860007	5.40988	0.00130724	0.0260564
NM_019440	Irgm2	3514	1.9901	3.64178	0.00130891	0.0260564
NM_146188	Kctd15	2411	1.13841	4.27317	0.00131235	0.026075
NM_172772	Fam63b	8081	-0.859151	5.96314	0.00131481	0.026075
NM_173413	Rab8b	4751	0.782557	6.18724	0.00133306	0.0263871
NM_053141	Pcdhb16	5270	1.13104	3.92562	0.00133681	0.0264114
NM_025481	Smurf2	5331	-0.781256	6.86813	0.00134416	0.0265067
NM_023794	Etv5	3822	0.789719	6.45792	0.00135083	0.0265883
NM_016719	Grb14	1963	1.16969	4.2061	0.00136085	0.0267353
NM_130859	Card10	4728	1.02562	3.99622	0.00136578	0.0267821
NM_019971	Pdgfc	3512	0.79696	6.00473	0.00140024	0.0273779
NM_026473	Tubb6	1744	0.85654	8.95252	0.00140139	0.0273779
NM_033591	Pcdhga8	4729	1.56593	3.17366	0.00141776	0.0276464
NM_177784	Klhl23	4617	-1.10818	3.8157	0.00142333	0.0277034
NM_015800	Crim1	5995	-0.757858	7.17988	0.00146136	0.028391
NM_028940	Clvs1	3604	-1.44067	2.45326	0.00146612	0.0284308
NM_024288	Rmnd5a	6165	-0.784181	6.5955	0.00152324	0.0294839
NM_010357	Gsta4	958	-1.22335	4.91846	0.00152658	0.0294942
NM_011150	Lgals3bp	2168	1.55908	6.48708	0.001553	0.0299002
NM_015783	Isg15	756	1.51487	4.29996	0.00155329	0.0299002
NM_016780	Itgb3	5779	1.07392	4.54742	0.00156633	0.030096
NM_010171	F3	1876	0.832844	6.90699	0.00157661	0.0301829
NM_018738	Igtp	2023	1.8313	3.32065	0.00157478	0.0301829
NM_001081066	Dennd3	5299	-1.06447	3.45601	0.0016	0.0305567
NR_015524	Cep83os	4135	-1.44142	1.90898	0.00160196	0.0305567
NM_007956	Esr1	4319	-1.09206	3.90623	0.00161206	0.0306935
NM_001013764	Ces1a	1979	-1.51877	1.91091	0.00162484	0.0308808
NM_028977	Lrrc17	2188	-1.38981	5.6446	0.00167388	0.0317553
NM_172689	Ddx58	4943	1.54685	6.84694	0.00168094	0.0318316
NM_007802	Ctsk	1583	1.33664	4.2117	0.00169084	0.0319614
NM_029662	Mfsd2a	2150	1.14176	3.05894	0.00170279	0.0321295
NM_001005423	Mreg	2493	1.39487	1.6891	0.00173076	0.0325985
NM_024188	Oxct1	3482	-0.765082	9.31631	0.00175905	0.0330129
NM_033037	Cdo1	1530	1.74147	2.30271	0.00175598	0.0330129
NM_018865	Wisp1	5022	0.762661	7.59294	0.00182685	0.0342242
NM_001033348	Ralgapa2	9610	-0.91976	6.12816	0.00183459	0.0343077
NM_007419	Adrb1	2491	-1.19959	4.11316	0.00183863	0.0343222
NM_008985	Ptprn	3535	0.812091	5.63734	0.00185256	0.0345208
NM_001039094	Negr1	5002	1.2869	3.00736	0.00190376	0.0354119
NM_001167983	Sipa1l1	7699	1.33168	1.58571	0.00191638	0.0355836
NM_033612	Cela1	1106	-0.997169	4.26588	0.0019266	0.0357102
NM_029938	H2afv	1636	-0.810308	6.26628	0.00193677	0.0358323
NM_145142	Chst10	3119	1.49342	1.62034	0.00194002	0.0358323
NM_028708	Jakmip3	5175	-1.291	2.10377	0.00195536	0.0360523
NM_146025	Samd14	3318	-0.841435	5.68286	0.00196904	0.0362408
NM_147219	Abca5	8269	-0.860878	5.60509	0.00197469	0.036281
NM_010437	Hivep2	9768	0.775304	5.83689	0.00199292	0.0365519
NM_001101479	Pabpc4l	5218	1.3369	1.70004	0.00199733	0.036569
NR_027974	3110070M22Rik	1128	1.10365	3.04098	0.00203154	0.0371305
NM_001289653	Nell2	3168	1.25726	1.92352	0.00204653	0.0373394
NM_177814	Erc2	6083	1.23603	3.07042	0.00207143	0.0377281
NM_010597	Kcnab1	3267	1.05997	3.7147	0.00207831	0.0377597
NM_024198	Gpx7	1214	-1.06014	4.58938	0.00208037	0.0377597
NM_013529	Gfpt2	2986	1.32077	2.49354	0.00210858	0.0382057
NM_010947	Ntn3	4896	-1.15148	3.0985	0.0021312	0.038549
NM_133955	Rhou	3367	0.738293	6.22581	0.00218507	0.0394554
NM_013586	Loxl3	4049	0.749746	7.47079	0.00221794	0.0397825
NM_027992	Tmem106b	6082	-0.717456	7.63409	0.00221836	0.0397825
NM_033595	Pcdhga12	5079	1.30412	3.06459	0.00221396	0.0397825
NM_178406	Gpr153	3777	1.11211	5.55522	0.002208	0.0397825
NM_013691	Thbs3	3183	0.931635	5.5243	0.00224017	0.0401052
NM_008185	Gstt1	1037	-1.34293	3.66123	0.0022603	0.0403966
NM_001267622	Ttc28	10687	-0.846394	7.07952	0.0022901	0.0408596
NM_007825	Cyp7b1	2166	-1.23642	3.1381	0.00230656	0.0410834
NM_001162903	Ccdc71l	4155	0.948417	4.15425	0.00231757	0.0412095
NM_011546	Zeb1	5806	0.73641	6.90895	0.00232415	0.0412566
NM_053144	Pcdhb19	4714	1.36701	3.02086	0.00234303	0.0414955
NM_178143	Prkaa2	8201	1.19729	2.7285	0.00234552	0.0414955
NM_013519	Foxc2	2724	-1.0597	5.28875	0.00235289	0.0415559
NM_007395	Acvr1b	3277	0.944894	4.18776	0.00236729	0.0417399
NM_175454	Hid1	3237	-1.38654	2.02366	0.00239737	0.0421994
NM_009196	Slc16a1	4430	0.727926	7.21209	0.0024041	0.042247
NM_028639	Ttc7	4615	-0.902278	5.15963	0.0024169	0.0424009
NM_144810	Klhdc8a	4269	0.838099	5.61025	0.00243746	0.0426902
NM_009368	Tgfb3	3385	0.84319	5.3235	0.00246663	0.0431291
NM_029492	Zdhhc20	5173	-0.706169	7.32375	0.002475	0.0432034
NM_009152	Sema3a	6850	1.18957	2.13853	0.00248649	0.0433319
NM_033578	Pcdhgb6	4683	-1.08353	3.86047	0.00251713	0.043793
NM_175332	E130012A19Rik	2330	1.2122	3.41816	0.00252513	0.0438595
NM_001013371	Dtx3l	5181	1.57467	5.04465	0.00261747	0.0453496
NM_206882	Hist3h2bb-ps	465	-1.49171	1.59105	0.00261956	0.0453496
NM_178711	Plscr4	3259	-1.06838	3.46373	0.00268406	0.0463895
NM_013820	Hk2	5511	0.797932	6.06502	0.00270315	0.0466427
NM_134081	Dnajc9	1631	-0.695979	6.75052	0.0027416	0.0472285
NM_173030	Galnt13	6966	-0.867756	5.62244	0.00274746	0.0472518
NM_144549	Trib1	4026	0.782558	5.7562	0.00278112	0.0477524
NM_198642	5031414D18Rik	2651	-1.23163	1.98501	0.00280898	0.048152
NM_021524	Nampt	4547	0.712352	7.04394	0.00286228	0.0489856
NM_138745	Mthfd1	3324	0.695068	7.10161	0.00288627	0.0493158
NM_172436	Slc25a12	2924	-0.725792	6.34185	0.00289895	0.0494518
NM_134023	Tbc1d10a	1913	-0.813761	5.1748	0.0029173	0.0496841
