# Supplementary material for: A-type lamins bind both hetero- and euchromatin, the latter being regulated by lamina-associated polypeptide 2 alpha
Source: Genome Res. 2016 Apr;26(4):462–73. doi: 10.1101/gr.196220.115 (PMC4817770; doi:10.1101/gr.196220.115)
Supplement: Supplemental Material [file supp_gr.196220.115_Supplemental_Table2.xlsx]

## Sheet: Sheet1
Supplementary Table 2: significantly (FDR<=0.05) deregulated genes LAP2α KO vs. WT in regions differentially bound by lamin A/C in LAP2α KO vs. WT
Gene ID	Gene symbol	Gene Length [bp]	edgeR.logFC	edgeR.logCPM	edgeR.p.value	edgeR.FDR
NM_011858	Tenm4	10633	4.11311	6.20957	2.20059e-46	7.69547e-43
NM_028279	Naalad2	2690	-4.85513	3.9425	7.74076e-33	1.62417e-29
NM_008968	Ptgis	1751	-4.23655	4.72769	3.25555e-30	4.87914e-27
NM_013496	Crabp1	802	5.17928	4.84376	1.6977e-26	1.78106e-23
NM_033576	Pcdhgb4	4480	3.5335	4.43041	3.16453e-23	2.76659e-20
NM_001164528	Ildr2	8260	-2.68404	6.13175	3.73344e-20	2.06145e-17
NM_021456	Ces1g	2289	-3.62132	3.32087	1.34577e-19	6.13847e-17
NM_008709	Mycn	2596	3.75344	3.31486	4.98993e-19	2.18123e-16
NM_001008231	Daam2	6045	-2.4873	6.13521	9.44737e-18	3.67083e-15
NM_008409	Itm2a	1632	3.55447	4.21432	2.63537e-17	9.2159e-15
NM_177906	Opcml	5992	-3.12546	3.49151	2.52843e-16	8.5567e-14
NM_011412	Slit3	4996	2.37533	7.56545	5.11831e-16	1.62716e-13
NM_026376	Plxnd1	6907	-2.13366	7.05403	2.80323e-15	7.94831e-13
NM_001033207	Nlrc5	6945	2.63628	4.64084	2.08368e-13	4.85775e-11
NM_013724	Nrk	6602	2.92678	5.37704	2.04765e-13	4.85775e-11
NM_024223	Crip2	1439	-2.51546	4.34569	2.52273e-13	5.75346e-11
NM_019732	Runx3	3891	2.50122	4.37508	2.9637e-13	6.61535e-11
NM_027268	Scrn1	1777	-2.3613	4.55637	3.58912e-13	7.84446e-11
NM_001081130	Ogdhl	3449	2.79887	3.18377	4.66688e-13	9.99189e-11
NM_018857	Msln	2115	3.61714	3.63273	5.02684e-13	1.05473e-10
NM_021384	Rsad2	3785	2.9291	3.62797	6.45877e-13	1.32861e-10
NM_019517	Bace2	3736	-2.87516	3.45817	1.30154e-12	2.62586e-10
NM_176973	Podxl2	2000	-2.57636	3.69968	2.41059e-12	4.68324e-10
NM_001085521	Syndig1	2055	-2.33132	3.96884	6.15883e-12	1.07687e-09
NM_023850	Chst1	2682	-2.0713	4.8053	1.74674e-11	2.86329e-09
NM_010720	Lipg	3787	2.4286	3.87067	6.33869e-11	9.49988e-09
NM_139001	Cspg4	8050	2.48173	3.94185	9.14432e-11	1.31415e-08
NM_001081652	Nacad	4893	-2.01103	4.67618	1.39358e-10	1.87436e-08
NM_133764	Atp6v0e2	1834	-2.57752	2.42636	2.23399e-10	2.85815e-08
NM_008817	Peg3	6624	-4.07651	3.47003	2.46608e-10	3.11707e-08
NM_172285	Plcg2	4298	-2.1788	3.59169	3.54989e-10	4.28068e-08
NM_009382	Thy1	1735	1.82959	9.39422	5.66993e-10	6.53662e-08
NM_008572	Mcpt8	839	3.19846	2.11038	7.93767e-10	8.9542e-08
NM_011125	Pltp	1806	-2.29885	3.24595	1.15299e-09	1.26001e-07
NM_001039231	Zfp951	2903	2.25242	3.88135	1.49848e-09	1.60414e-07
NM_001167923	Col6a5	9297	-2.14947	3.50051	1.51526e-09	1.60572e-07
NM_021316	Cend1	1657	-3.01694	1.27552	1.7383e-09	1.82365e-07
NM_013723	Podxl	5330	2.14886	4.49014	2.96744e-09	2.90948e-07
NM_008909	Ppl	6277	-1.7821	4.8489	3.88175e-09	3.7361e-07
NR_015533	A230057D06Rik	2004	-3.17836	1.27658	4.22081e-09	3.98924e-07
NM_175549	Robo2	8047	2.35429	3.21209	5.55537e-09	5.06795e-07
NM_033584	Pcdhga1	4537	2.89403	2.89244	8.17279e-09	7.08601e-07
NM_182809	Ntrk3	3832	-2.54816	1.78999	9.03752e-09	7.77152e-07
NM_013599	Mmp9	3174	-2.10815	4.22621	1.18181e-08	9.99866e-07
NM_011213	Ptprf	7648	1.99423	5.3566	1.36481e-08	1.12742e-06
NM_010380	H2-D1	1736	2.20818	4.8083	2.22369e-08	1.79681e-06
NM_011491	Stc2	1793	2.1241	3.03342	2.22653e-08	1.79681e-06
NM_028841	Tspan17	1556	-1.8036	4.58235	2.35949e-08	1.88825e-06
NM_033586	Pcdhga3	4691	2.29913	3.26534	3.0669e-08	2.38332e-06
NM_008610	Mmp2	3041	-1.64452	8.69188	3.2236e-08	2.48668e-06
NM_138665	Sardh	4558	-1.5779	5.78122	4.23333e-08	3.17227e-06
NM_198095	Bst2	766	3.15023	5.59108	5.63729e-08	4.16484e-06
NM_010474	Hs3st1	1685	3.06239	1.57259	6.32616e-08	4.6411e-06
NM_011542	Tcea3	1247	-2.14778	2.47193	7.15344e-08	5.21158e-06
NM_020557	Cmpk2	3189	2.16756	4.1325	7.54988e-08	5.46247e-06
NM_145144	Aif1l	2953	2.20317	4.7027	7.91193e-08	5.68521e-06
NM_010140	Epha3	3978	2.53274	1.86233	9.20286e-08	6.56783e-06
NM_027711	Iqgap2	5771	1.99698	3.34066	9.85891e-08	6.9885e-06
NM_183029	Igf2bp2	3899	1.31418	7.40649	1.05684e-07	7.44115e-06
NM_010444	Nr4a1	2476	2.24203	5.44297	1.14337e-07	7.9438e-06
NM_011267	Rgs16	2335	1.52426	4.86744	1.34441e-07	9.27911e-06
NM_010345	Grb10	5089	1.70489	4.89112	1.69963e-07	1.15784e-05
NM_001098528	Kcnb2	5309	2.49402	1.44116	1.93635e-07	1.30219e-05
NM_001033272	Spata13	7517	1.29652	6.32961	2.00797e-07	1.34176e-05
NM_001001892	H2-K1	1646	2.36028	5.24176	2.20931e-07	1.45773e-05
NM_153393	Col23a1	5665	-1.96599	4.06643	2.20548e-07	1.45773e-05
NM_009447	Tuba4a	2053	1.52211	4.73442	2.75251e-07	1.7895e-05
NM_010145	Ephx1	1665	-1.45136	6.00769	2.7633e-07	1.7895e-05
NM_010713	Lhx8	1977	2.3139	2.27123	2.88555e-07	1.84587e-05
NM_001161665	Kif26b	7406	1.39045	5.4342	3.70885e-07	2.2888e-05
NM_025949	Rps6ka6	4683	2.55898	2.83466	4.39909e-07	2.68319e-05
NM_133903	Spon2	2237	-2.0167	5.30287	4.86148e-07	2.91439e-05
NM_025685	Col27a1	7634	1.86312	3.98554	4.96736e-07	2.96094e-05
NM_010662	Krt13	1314	-2.5469	1.41689	5.64391e-07	3.27408e-05
NM_177897	B4galnt4	3105	1.92272	2.93316	5.78849e-07	3.33665e-05
NM_010942	Nsg1	2140	1.82885	4.66053	7.06723e-07	3.96483e-05
NM_007738	Col7a1	9198	1.23574	6.80589	8.3305e-07	4.62409e-05
NM_053140	Pcdhb15	2795	2.22903	2.11049	8.6327e-07	4.74166e-05
NM_025374	Glo1	1939	-1.27522	6.0037	1.50894e-06	7.92689e-05
NM_133930	Creld1	2034	-1.72353	3.67182	1.49837e-06	7.92689e-05
NM_133888	Smpdl3b	1925	1.51663	4.17779	1.63483e-06	8.53281e-05
NM_001113384	Gnao1	6005	-1.28502	6.76603	1.67823e-06	8.716e-05
NM_001077354	C77370	10890	1.72554	3.63273	1.78438e-06	9.22165e-05
NM_007428	Agt	1839	-2.78155	4.41572	1.80183e-06	9.26618e-05
NM_019432	Tmem37	1017	-1.98578	2.28347	1.84532e-06	9.44353e-05
NM_030209	Crispld2	4150	1.67142	3.62688	1.8901e-06	9.62576e-05
NM_008795	Cdk18	3046	-1.53924	5.27352	2.1187e-06	0.000106745
NM_009142	Cx3cl1	3143	-1.32922	6.38681	2.17791e-06	0.000108802
NR_015521	1700030C10Rik	1724	1.85596	2.73649	2.27999e-06	0.000113362
NM_008032	Aff2	4486	1.8226	3.43359	2.47571e-06	0.000121368
NM_010305	Gnai1	3193	1.89311	2.90607	2.69809e-06	0.000131045
NM_178638	Tmem108	3692	2.02721	2.13669	3.13878e-06	0.000150361
NM_028176	Cda	809	-1.68689	3.24613	3.74111e-06	0.000176556
NM_172771	Dmxl2	10614	1.76597	3.32314	3.75294e-06	0.000176556
NM_009622	Adcy1	12258	-1.50743	4.50129	4.43481e-06	0.00020678
NM_023627	Isyna1	1838	-1.41736	4.69159	4.54918e-06	0.000211175
NM_011909	Usp18	1771	3.87759	4.1796	4.58522e-06	0.00021191
NM_001024474	Diras2	4348	-1.85813	4.21927	5.42181e-06	0.000245174
NM_001162864	Ttbk1	6959	-1.68663	3.99673	5.64527e-06	0.000254183
NM_001033481	Myrf	5597	-1.75616	3.16995	5.88067e-06	0.00026365
NM_145155	Wasf3	2685	-1.48528	4.13456	6.17525e-06	0.000273352
NM_029935	Chst15	4265	1.37523	5.05835	6.27025e-06	0.000276391
NM_011854	Oasl2	3136	3.18459	5.15213	7.27024e-06	0.0003178
NM_024495	Car13	2299	-1.16713	6.6831	7.6625e-06	0.000330812
NM_001039530	Parp14	7251	2.69405	5.27479	8.72839e-06	0.000370727
NM_010496	Id2	1272	-1.2893	5.15678	1.00325e-05	0.000422696
NM_019967	Brinp1	3354	2.19469	1.95549	1.31558e-05	0.00053913
NM_022410	Myh9	7435	-1.13671	10.8128	1.37331e-05	0.00055413
NM_030725	Syt13	3751	-1.61611	4.26008	1.67348e-05	0.00066002
NM_031174	Dscam	7480	-1.34996	4.47401	1.83835e-05	0.000711663
NM_207205	Igsf3	7330	-1.12091	6.19044	1.95865e-05	0.000747207
NM_139298	Wnt9a	3318	1.70697	2.25144	1.98106e-05	0.00075302
NM_001044308	Cacna1i	9794	-1.34914	4.63366	1.99627e-05	0.000756058
NM_172647	F11r	2482	1.62125	3.83321	2.06685e-05	0.000774404
NM_183162	Helz2	10109	1.81934	6.05503	2.23657e-05	0.000829111
NM_028623	Cst6	3951	-1.96515	4.06366	2.26575e-05	0.00083697
NM_148933	Slco4a1	3087	2.02417	3.62523	2.34022e-05	0.000858434
NM_009546	Trim25	5563	1.47647	5.70151	2.36803e-05	0.00086561
NM_026681	Ccdc88c	6292	1.73809	2.54275	2.87158e-05	0.0010212
NM_133778	Fam131a	2271	-1.66801	2.41062	2.9497e-05	0.00104193
NM_009396	Tnfaip2	3570	1.01296	7.41434	3.02436e-05	0.00106472
NR_001592	H19	2615	1.97776	4.06641	3.10257e-05	0.00108497
NM_001024720	Hmcn1	18314	2.14484	3.65677	3.15613e-05	0.00109642
NM_001012401	Hspb6	1325	-1.2102	5.01977	3.33972e-05	0.00114875
NR_102396	C130046K22Rik	3313	1.92279	1.51575	3.41426e-05	0.00116801
NM_019676	Plcd1	2656	-1.18011	4.93254	3.43126e-05	0.00116874
NM_133765	Fbxo31	4355	-1.01972	6.17735	3.65152e-05	0.00123177
NM_030206	Cygb	2331	-1.67698	2.41317	4.15348e-05	0.00138771
NM_013614	Odc1	2547	1.01682	8.63517	4.29444e-05	0.00142573
NM_026455	Fam32a	1921	1.03973	6.07674	4.49207e-05	0.00148196
NM_207000	H2afy2	1910	-1.21968	4.56731	4.6468e-05	0.00152343
NM_009593	Abcg1	5818	-1.35095	4.4739	4.69637e-05	0.00153011
NM_001025246	Trp53i11	2662	1.4857	3.1652	4.95742e-05	0.00161016
NM_030889	Sorcs2	5721	1.65413	4.08003	5.71589e-05	0.00182821
NM_001033767	Gm4951	2648	2.14144	2.28642	5.74288e-05	0.00183126
NM_008168	Grik5	3838	-1.49914	4.59296	6.71785e-05	0.00211009
NM_011898	Spry4	4590	1.49213	5.29539	7.64008e-05	0.00235741
NM_001024624	Cdkl5	3246	1.53171	2.69191	7.72006e-05	0.00237511
NM_021422	Dnaja4	3005	1.71524	3.12991	8.51607e-05	0.0025747
NM_172884	2900026A02Rik	5838	-1.27136	5.39234	8.57865e-05	0.00258617
NM_033314	Slco2a1	4033	-1.02345	6.00196	8.92323e-05	0.00265948
NM_009369	Tgfbi	2678	-1.36235	6.21746	0.000112622	0.00326386
NM_029011	Pyroxd2	3119	-1.45306	3.27091	0.000133379	0.00377758
NM_175358	Zdhhc15	5508	1.55141	2.67638	0.000133589	0.00377758
NM_031176	Tnxb	9569	-1.14342	4.81619	0.000137653	0.00386126
NM_033577	Pcdhgb5	4522	1.97752	3.02669	0.000139337	0.00388772
NM_025817	Tril	5358	-1.46882	3.6531	0.000139969	0.00389499
NM_001081235	Mn1	6128	-0.962273	6.01267	0.00014429	0.00398355
NM_172393	Aim1	7416	-1.39604	6.33117	0.000155231	0.00426317
NM_009251	Serpina3g	2004	1.7432	3.25413	0.000174068	0.00472798
NM_026940	Ydjc	1320	1.83342	2.05799	0.000185779	0.00502323
NM_033589	Pcdhga6	4540	1.55373	3.61817	0.00018787	0.00505369
NM_033574	Pcdhgb1	4498	1.65778	2.64275	0.000202628	0.00540908
NM_013654	Ccl7	799	-0.86217	7.81665	0.000206113	0.00548814
NM_025378	Ifitm3	648	1.12282	7.6194	0.000214204	0.00566049
NM_178856	Gins2	1038	-0.955192	6.03792	0.000215969	0.00567854
NM_197988	1190005I06Rik	734	-1.51415	1.9212	0.000220457	0.00575674
NM_183287	2610318N02Rik	1266	1.6517	1.63675	0.000226957	0.0059082
NM_013605	Muc1	2243	1.36722	2.71671	0.000247554	0.00636543
NM_153582	Cmtm4	7732	-0.923102	7.82337	0.000256009	0.0065507
NM_145515	Mark1	4565	1.22144	3.74342	0.000282348	0.00710338
NM_001100449	Taf4b	5149	1.26385	4.23191	0.000292827	0.00727974
NM_145508	Dyrk3	2072	1.44838	2.21966	0.000306992	0.00759589
NM_027335	2210016F16Rik	2822	1.11311	4.44739	0.000315974	0.0077839
NM_033580	Pcdhgb8	4617	1.60357	3.17701	0.000316075	0.0077839
NM_176848	Fbxo2	1234	-1.52264	3.24788	0.000316958	0.00778737
NM_030565	Fam20c	3001	-1.21413	3.96542	0.000344101	0.0083371
NM_021409	Pard6b	3399	1.45756	2.9175	0.000374052	0.00891859
NR_110496	A330074K22Rik	2489	-1.13628	4.72074	0.000374042	0.00891859
NM_009500	Vav2	3482	-0.998066	4.96606	0.000382503	0.00905832
NM_010299	Gm2a	4256	-0.988154	5.1407	0.000389141	0.00919476
NM_008711	Nog	1922	1.72792	2.76776	0.000418181	0.00983664
NM_026738	1110007C09Rik	804	-1.01283	5.59437	0.000430277	0.010076
NM_011380	Six2	2108	1.20291	3.31027	0.000493604	0.0113811
NM_178929	Kazald1	1380	-1.27821	2.75238	0.000558501	0.0127652
NM_001159910	Ccdc85c	1547	1.25397	3.82206	0.000562802	0.0128356
NM_021454	Cdc42ep5	864	1.4144	4.03616	0.000568057	0.0129273
NM_010398	H2-T23	1317	-1.19442	4.03279	0.000628735	0.0141851
NM_144533	Nmnat3	2160	1.32229	3.09003	0.000656139	0.0147084
NM_053142	Pcdhb17	3270	1.00829	4.71764	0.000705073	0.0156053
NM_029197	Meiob	1703	-1.48018	1.36433	0.000714001	0.0157696
NM_027950	Osgin1	1961	-1.06581	4.40444	0.000716859	0.0157779
NM_030253	Parp9	3564	1.65777	5.1941	0.000731108	0.0160126
NM_023184	Klf15	2294	-1.74503	3.00604	0.000748419	0.0163236
NM_019800	Acp6	1756	0.975311	4.678	0.000813271	0.0176282
NM_008029	Flt4	5839	1.70176	3.02287	0.000820542	0.0177491
NM_011973	Mok	1693	1.5467	1.62875	0.000887964	0.0190115
NM_029352	Dusp9	2700	1.2227	3.10882	0.000897294	0.0191721
NM_177628	Fam167a	4235	1.26194	2.67715	0.000914564	0.0195014
NM_172770	Ttc12	3630	1.38137	1.95505	0.000928964	0.0197683
NM_019511	Ramp3	1221	1.70591	2.24006	0.000951014	0.0200746
NM_010478	Hspa1b	2810	-0.905198	5.47952	0.00102345	0.0214311
NM_019990	Stard10	1198	-1.26962	3.11127	0.00102631	0.0214483
NM_145624	Zfp709	3975	1.32287	2.07877	0.0010319	0.0215223
NM_028785	Dock8	7810	1.23123	3.06589	0.00104425	0.0217366
NM_172418	Mamstr	2179	-1.40198	1.53022	0.00109111	0.0226671
NM_178407	Arap2	7362	1.2626	2.73352	0.00110963	0.0230061
NM_146236	Tceal1	1108	-1.40606	2.11172	0.00112348	0.0232474
NM_201244	Copg1	877	-1.19566	3.0255	0.00112624	0.0232585
NM_177047	Auts2	6059	-1.01074	4.89981	0.00115265	0.0236643
NM_146007	Col6a2	3729	-0.907302	9.56802	0.0011715	0.0239575
NM_020568	Plin4	5755	-1.10089	3.7981	0.00118799	0.0242005
NM_016846	Rgl1	3887	0.785871	6.3935	0.00124892	0.0252942
NM_008478	L1cam	5288	-1.52927	4.10624	0.00126518	0.0255251
NM_009354	Tert	3426	-1.21551	4.02008	0.00127589	0.0256918
NM_009167	Shc3	1536	-1.41789	1.43309	0.00129994	0.0259766
NM_010593	Jup	5009	-0.860007	5.40988	0.00130724	0.0260564
NM_019440	Irgm2	3514	1.9901	3.64178	0.00130891	0.0260564
NM_146188	Kctd15	2411	1.13841	4.27317	0.00131235	0.026075
NM_053141	Pcdhb16	5270	1.13104	3.92562	0.00133681	0.0264114
NM_023794	Etv5	3822	0.789719	6.45792	0.00135083	0.0265883
NM_130859	Card10	4728	1.02562	3.99622	0.00136578	0.0267821
NM_033591	Pcdhga8	4729	1.56593	3.17366	0.00141776	0.0276464
NM_011150	Lgals3bp	2168	1.55908	6.48708	0.001553	0.0299002
NM_018738	Igtp	2023	1.8313	3.32065	0.00157478	0.0301829
NM_001081066	Dennd3	5299	-1.06447	3.45601	0.0016	0.0305567
NM_001013764	Ces1a	1979	-1.51877	1.91091	0.00162484	0.0308808
NM_007419	Adrb1	2491	-1.19959	4.11316	0.00183863	0.0343222
NM_008985	Ptprn	3535	0.812091	5.63734	0.00185256	0.0345208
NM_001039094	Negr1	5002	1.2869	3.00736	0.00190376	0.0354119
NM_033612	Cela1	1106	-0.997169	4.26588	0.0019266	0.0357102
NM_028708	Jakmip3	5175	-1.291	2.10377	0.00195536	0.0360523
NM_013529	Gfpt2	2986	1.32077	2.49354	0.00210858	0.0382057
NM_133955	Rhou	3367	0.738293	6.22581	0.00218507	0.0394554
NM_033595	Pcdhga12	5079	1.30412	3.06459	0.00221396	0.0397825
NM_178406	Gpr153	3777	1.11211	5.55522	0.002208	0.0397825
NM_013691	Thbs3	3183	0.931635	5.5243	0.00224017	0.0401052
NM_008185	Gstt1	1037	-1.34293	3.66123	0.0022603	0.0403966
NM_001267622	Ttc28	10687	-0.846394	7.07952	0.0022901	0.0408596
NM_053144	Pcdhb19	4714	1.36701	3.02086	0.00234303	0.0414955
NM_013519	Foxc2	2724	-1.0597	5.28875	0.00235289	0.0415559
NM_007395	Acvr1b	3277	0.944894	4.18776	0.00236729	0.0417399
NM_175454	Hid1	3237	-1.38654	2.02366	0.00239737	0.0421994
NM_144810	Klhdc8a	4269	0.838099	5.61025	0.00243746	0.0426902
NM_033578	Pcdhgb6	4683	-1.08353	3.86047	0.00251713	0.043793
NM_175332	E130012A19Rik	2330	1.2122	3.41816	0.00252513	0.0438595
NM_001013371	Dtx3l	5181	1.57467	5.04465	0.00261747	0.0453496
NM_206882	Hist3h2bb-ps	465	-1.49171	1.59105	0.00261956	0.0453496
NM_134023	Tbc1d10a	1913	-0.813761	5.1748	0.0029173	0.0496841
