# Supplementary material for: A-type lamins bind both hetero- and euchromatin, the latter being regulated by lamina-associated polypeptide 2 alpha
Source: Genome Res. 2016 Apr;26(4):462–73. doi: 10.1101/gr.196220.115 (PMC4817770; doi:10.1101/gr.196220.115)
Supplement: Supplemental Material [file supp_gr.196220.115_Supplemental_Table3.xlsx]

## Sheet: TABLE_SEQSTATS
Supplementary Table 3: Sequencing read counts
			Number of Reads
Sample	Genotype	Cycles of Sonication	Sequenced	Mapped	Filtered	Deduplicated
Input	Lap2α+/+	12	48355560	47178671	37637906	34261880
Input	Lap2α+/+	30	89373586	87916720	69520876	68990286
Input	Lap2α-/-	12	48411566	47372316	37936340	35945058
Input	Lap2α-/-	30	120478976	117824485	91550674	87750372
LAP2α	Lap2α+/+	12	77233722	75061471	58042756	55802086
LAP2α	Lap2α+/+	30	101083260	98558118	75205654	72443774
Lamin A/C 3A6	Lap2α+/+	12	85574752	83596033	65354810	63070414
Lamin A/C 3A6	Lap2α+/+	30	125138352	122900993	96555618	92277152
Lamin A/C 3A6	Lap2α-/-	12	79472664	77641142	59371002	57564576
Lamin A/C 3A6	Lap2α-/-	30	132526678	129049737	100232962	98598390
Lamin A/C N18	Lap2α+/+	12	100257080	97798829	76646160	73066974
Lamin A/C N18	Lap2α+/+	30	123025994	120648515	96488386	71183178
Lamin A/C N18	Lap2α-/-	12	60521738	58817884	45556636	44869984
Lamin A/C N18	Lap2α-/-	30	130846690	128185193	102320972	94745796
Lamin B	Lap2α+/+	12	168337044	165180275	127579842	120787318
Lamin B	Lap2α+/+	30	164322210	161333993	125608080	120919904
Lamin B	Lap2α-/-	12	133766318	131062624	100949476	92569726
Lamin B	Lap2α-/-	30	161009592	152937576	119352578	115349390
H3K9Ac	Lap2α+/+	12	59093270	58011832	46483072	45901248
H3K9Ac	Lap2α-/-	12	51720046	50891405	40912808	40405210
H3K4me3	Lap2α+/+	12	59725948	58760925	47924470	47473754
H3K4me3	Lap2α-/-	12	55829534	54902654	44399384	43950896
H3K27me3	Lap2α+/+	12	54168042	53250567	42065438	41268988
H3K27me3	Lap2α-/-	12	54236750	53215561	41827906	41455542
H3K9me3	Lap2α+/+	12	92814372	88962277	57647804	57037572
H3K9me3	Lap2α-/-	12	81949296	78439561	52598658	51434690
